# Supplementary material
Source: PubMed Central journal article supplement (PMC4170007)
Supplement: NIHMS618684-supplement-1.pdf [file NIHMS618684-supplement-1.pdf]

# Supplemental Figure 1

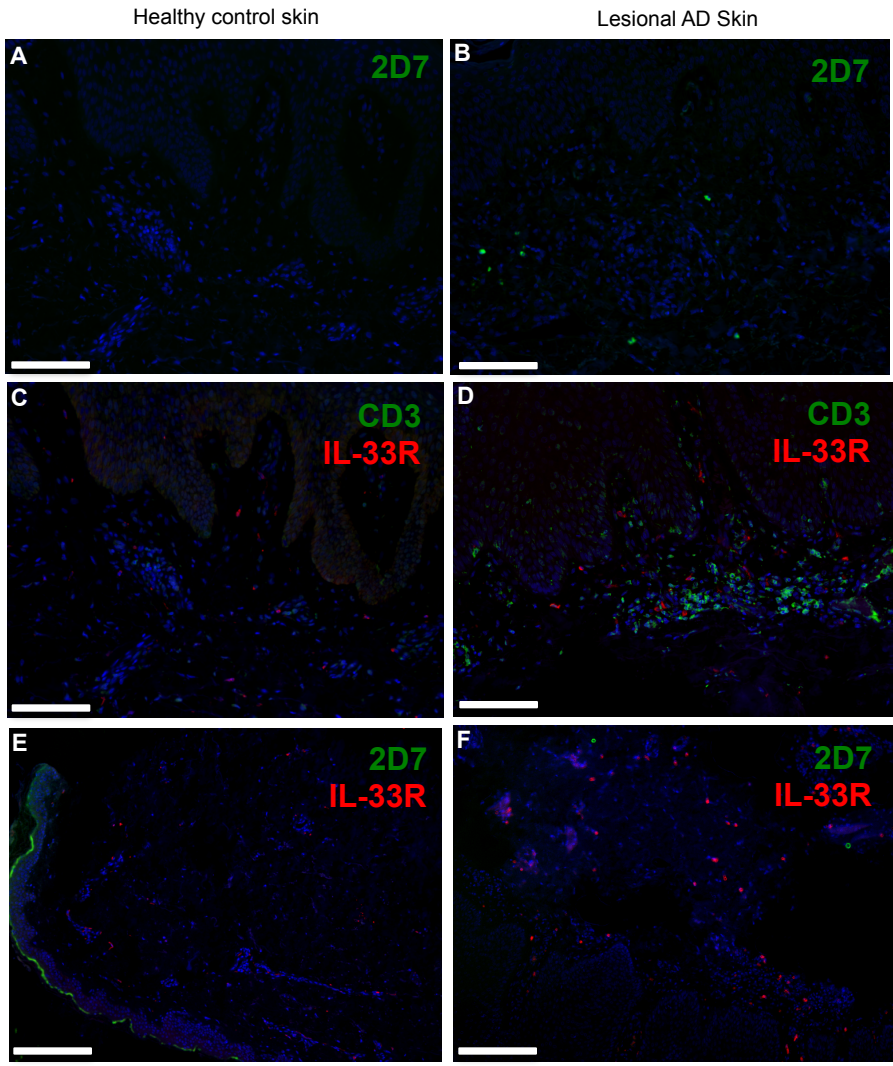

**Supplemental Figure 1.** Basophils accumulate in close proximity to ILC2s in human AD skin lesions. **(A)** Immunofluorescence (IF) staining of 2D7<sup>+</sup> (green) cells in healthy control and **(B)** lesional AD skin, IL-33R<sup>+</sup> (red) and CD3<sup>+</sup> (green) cells in **(C)** healthy skin and **(D)** lesional AD skin, and 2D7<sup>+</sup> (green) and IL-33R<sup>+</sup> (red) in **(E)** healthy control and **(F)** lesional AD skin. DAPI<sup>+</sup> cells are blue. Scale bars, 50 μm. Healthy control skin *n* = 10; lesional AD skin *n* = 14.

# Supplemental Figure 2

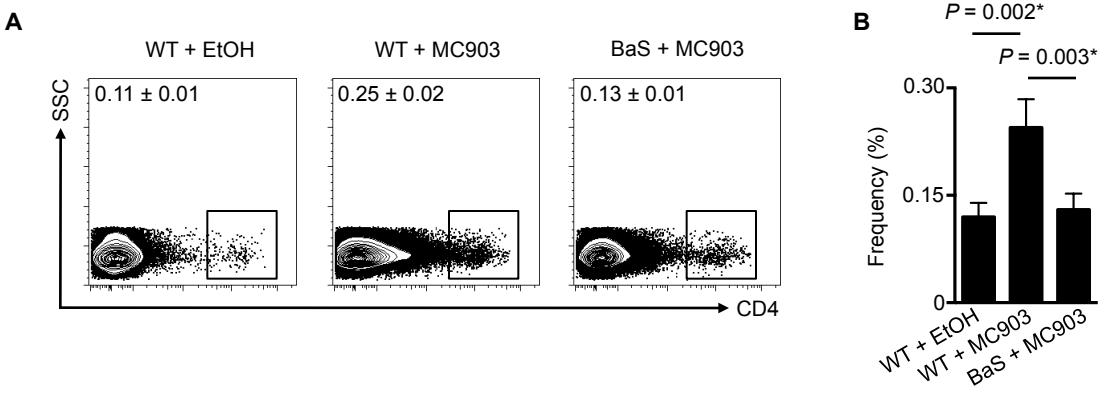

**Supplemental Figure 2.** CD4<sup>+</sup> T cell responses are dependent on basophils. **(A)** Skin CD4<sup>+</sup> T cells and associated **(B)** frequencies in wild-type (WT) mice treated with control vehicle (ethanol, EtOH) or MC903 and BaS-TRECK (BaS) mice treated with MC903. Cell frequencies are given as a percentage of total live cells. Data are representative of two independent experiments;  $n = 3$  mice per group per experiment. Actual  $P$ -values shown.
